# Supplementary material for: Identification, Typing and Drug Resistance of Cronobacter spp. in Powdered Infant Formula and Processing Environment
Source: MDPI journal article supplement (doi:10.3390/foods12051084), 2023-03-03
Supplement: s1 [file s1]

## Supplementary Tables

**Table S1.** Bacterial strains used in this investigation and their sources

| Strains | Bacterial species     | Area      | Source                    |
|---------|-----------------------|-----------|---------------------------|
| CS1     | <i>C. sakazakii</i>   | Northeast | PIF                       |
| CS2     | <i>C. sakazakii</i>   | Central   | PIF                       |
| CM3     | <i>C. malonaticus</i> | Northern  | PIF                       |
| CS4     | <i>C. sakazakii</i>   | Northeast | PIF                       |
| CS5     | <i>C. sakazakii</i>   | Northeast | PIF                       |
| CS6     | <i>C. sakazakii</i>   | Northeast | PIF                       |
| CS7     | <i>C. sakazakii</i>   | Northeast | End product of workshop   |
| CS8     | <i>C. sakazakii</i>   | Northeast | PIF                       |
| CS9     | <i>C. sakazakii</i>   | Northeast | PIF                       |
| CS10    | <i>C. sakazakii</i>   | Northern  | PIF                       |
| CS11    | <i>C. sakazakii</i>   | Northeast | PIF                       |
| CS12    | <i>C. sakazakii</i>   | Northern  | PIF                       |
| CS13    | <i>C. sakazakii</i>   | Northern  | PIF                       |
| CS14    | <i>C. sakazakii</i>   | Southern  | PIF                       |
| CS15    | <i>C. sakazakii</i>   | Northeast | Whey powder               |
| CM16    | <i>C. malonaticus</i> | Northern  | PIF                       |
| CS17    | <i>C. sakazakii</i>   | Northeast | Milk powder raw materials |
| CS18    | <i>C. sakazakii</i>   | Northeast | PIF                       |
| CS19    | <i>C. sakazakii</i>   | Northeast | PIF                       |
| CS20    | <i>C. sakazakii</i>   | Northern  | PIF                       |
| CS21    | <i>C. sakazakii</i>   | Northern  | PIF                       |
| CM22    | <i>C. malonaticus</i> | Northeast | PIF                       |
| CT23    | <i>C. turicensis</i>  | Northern  | PIF                       |
| CM24    | <i>C. malonaticus</i> | Northeast | PIF                       |
| CS25    | <i>C. sakazakii</i>   | Northeast | PIF                       |
| CS26    | <i>C. sakazakii</i>   | Northeast | PIF                       |
| CS27    | <i>C. sakazakii</i>   | Northeast | Milk powder raw materials |
| CT28    | <i>C. turicensis</i>  | Northern  | PIF                       |
| CM29    | <i>C. malonaticus</i> | Northern  | PIF                       |
| CS30    | <i>C. sakazakii</i>   | Northern  | PIF                       |
| CD31    | <i>C. dublinensis</i> | Northern  | PIF                       |
| CS32    | <i>C. sakazakii</i>   | Northwest | PIF                       |
| CS33    | <i>C. sakazakii</i>   | Southern  | Milk powder additive      |
| CS81    | <i>C. sakazakii</i>   | Northeast | PIF                       |
| CS100   | <i>C. sakazakii</i>   | Northeast | End product of workshop   |

**Table S2.** 16S rRNA and 7 sets of PCR primers for housekeeping genes

| Primers        | Primer sequences (5'→3')              |
|----------------|---------------------------------------|
| 27-F           | AGTCTCTGATCATGCCTCAG                  |
| 1492-R         | AAGGAGGTGCTCCAGCC                     |
| <i>atpD</i> -F | CGACATGAAAGGCGACATCGAAATGACCGACTCCAA  |
| <i>atpD</i> -R | TTAAAGCCACGGATGGTGGGATGGCGATGATGTCTT  |
| <i>fusA</i> -F | GAAACCGTATGGCGTCAGGCTGGATGCGGTAATTGA  |
| <i>fusA</i> -R | AGAACCGAAGTGCAGACGCCCATAACCAGCGATGATG |
| <i>glnS</i> -F | GCATCTACCCGATGTACGGGGTGCTGGATAACATCA  |
| <i>glnS</i> -R | TTGGCACGCTGAACAGACCTTGTTGGCTTCTTCACG  |
| <i>gltB</i> -F | CATCTCGACCATCGCTTCGCGAATACCACGCCTACA  |
| <i>gltB</i> -R | CAGCACTTCCACCAGCTCGCGTATTTACGGAGGAG   |
| <i>gyrB</i> -F | TGCACCACATGGTATTCGCTCGCGGGTCACTGTAAA  |
| <i>gyrB</i> -R | CACCGGTCACAACTCGTACGCCGATACCGTCTTTT   |
| <i>infB</i> -F | GAAGAAGCGGTAATGAGCTGACCACGGTAAAACCTC  |
| <i>infB</i> -R | CGATACCACATTCCATGCGGACCACGACCTTTATCC  |
| <i>ppsA</i> -F | GTCCAACAATGGCTCGTCACCCTGACGAATTCTACG  |
| <i>ppsA</i> -R | CAGACTCAGCCAGGTTTGCAGATCCGGCATGGTATC  |

Note: F stands for forwarding sequence and R stands for reverse sequence

**Table S3.** Target genes and primers of qRT-PCR

| Gene                         | Primer sequences (5'→3')                                      |
|------------------------------|---------------------------------------------------------------|
| <i>emrA</i> (CSK29544_01824) | F: CGACTTTCACCAGCGTGGACAG<br>R: TGGATCAAAGTGGTTCAGCGTCTG      |
| CSK29544_03309               | F: CGCCCTGCTCTATAACGACAACC<br>R: GCCACTGCCGATCACCTGAATC       |
| <i>yojI</i> (CSK29544_02362) | F: GACGCTCGCCATGCTCTTAACG<br>R: AACAGCCAGACATCGGTGAACAC       |
| <i>mdfA</i> (CSK29544_03801) | F: ATCTGCTCGCCGCTGATGATAATG<br>R: CGTGAAGTGGGCCGTGACTATAAAG   |
| <i>fliM</i> (CSK29544_02582) | F: TCACTCATTGGGCTGTTCCCTCATTC<br>R: CTGGTGTCATGTGGATGGCGTAC   |
| <i>mdlA</i> (CSK29544_04123) | F: AAACCACTATCGCAATCACCACCAG<br>R: CGGCGTCACTCAACACCACTAC     |
| <i>emrB</i> (CSK29544_03823) | F: CTGGACGGCGGGTGTAGATGAG<br>R: CGGCGAAGACGAAGACTGGTTC        |
| <i>pump</i> (CSK29544_00631) | F: TGTTTGGGCGAATAATCTCCCTGAC<br>R: CGCATAACCACGCTTACGGACATC   |
| CSK29544_03853               | F: GCGACGGGATGTTAATTCTCTGGAG<br>R: CGCCTTCGTTTCATCAGCAGTATCTC |
| <i>baeR</i> (CSK29544_02460) | F: CGATTCTGGCGGTCACCATCAC<br>R: GCGATCAGGTGTTGCCCTATGTG       |
| <i>16S rRNA</i>              | F: GGTGTAGCGGTGAAATGCGTAGAG<br>R: CATCGTTTACGGCGTGGACTACC     |

**Table S4** RNA quality test results of CS14

| Sample Name | NanoDrop Concentration<br>(ng/ $\mu$ L) | OD260/280 | OD260/230 | RIN |
|-------------|-----------------------------------------|-----------|-----------|-----|
| A1          | 1373.56                                 | 2.11      | 2.26      | 10  |
| A2          | 1252.36                                 | 2.12      | 2.31      | 10  |
| A3          | 1170.16                                 | 2.10      | 2.30      | 10  |
| B1          | 1229.76                                 | 2.11      | 2.33      | 10  |
| B2          | 1568.34                                 | 2.12      | 2.36      | 10  |
| B3          | 1161.17                                 | 2.13      | 2.35      | 10  |

Note: The concentrations of all samples were higher than 1000 ng/ $\mu$ L, and OD260/280 and OD260/230 were both greater than 2.0, indicating that the concentrations and purity of the extracted RNA were extremely high. Meanwhile, the results showed that the RIN values of the samples were all 10 points, and the integrity index was qualified, indicating that the RNA was not degraded and met the requirements of cDNA library construction for RNA-Seq sequencing.

**Table S5** Quality assessment of sample sequencing

| Sample Name | Reads      | Filtered Reads | Number of bases after filtering (bp) | Q20 (%) | Q30 (%) |
|-------------|------------|----------------|--------------------------------------|---------|---------|
| A1          | 15,915,740 | 14,850,340     | 2,227,551,000                        | 98.40   | 95.46   |
| A2          | 16,416,620 | 15,333,034     | 2,299,955,100                        | 98.31   | 95.32   |
| A3          | 20,878,590 | 19,481,760     | 2,922,264,000                        | 98.31   | 95.24   |
| B1          | 18,407,480 | 17,285,748     | 2,592,862,200                        | 98.24   | 94.91   |
| B2          | 15,476,550 | 14,155,266     | 2,123,289,900                        | 98.27   | 94.71   |
| B3          | 16,490,912 | 15,209,394     | 2,281,409,100                        | 98.18   | 94.54   |

Note: The constructed cDNA library was up-sequenced using the Illumina platform to obtain raw down-computed data, and the sequencing data were further filtered, and the sequencing data are shown in Table S5. The samples got 15,476,550~20,878,590 Raw Reads after offline, and 14,155,266~19,481,760 Clean Reads were obtained after cutting and removing the low-quality data, and the filtered base number was 2.12~2.92 Gb. The results showed that Q20% were all greater than 98%, and Q30% were all greater than 94%, indicating that the sequencing quality is high and can be used for subsequent analysis.
